# Supplementary material for: Phenotypical Characterization of the Nuclear Egress of Recombinant Cytomegaloviruses Reveals Defective Replication upon ORF-UL50 Deletion but Not pUL50 Phosphosite Mutation
Source: PubMed Central journal article supplement (PMC7911381; doi:10.3390/v13020165), 2021-01-22
Supplement: viruses-13-00165-s001.pdf [file viruses-13-00165-s001.pdf]

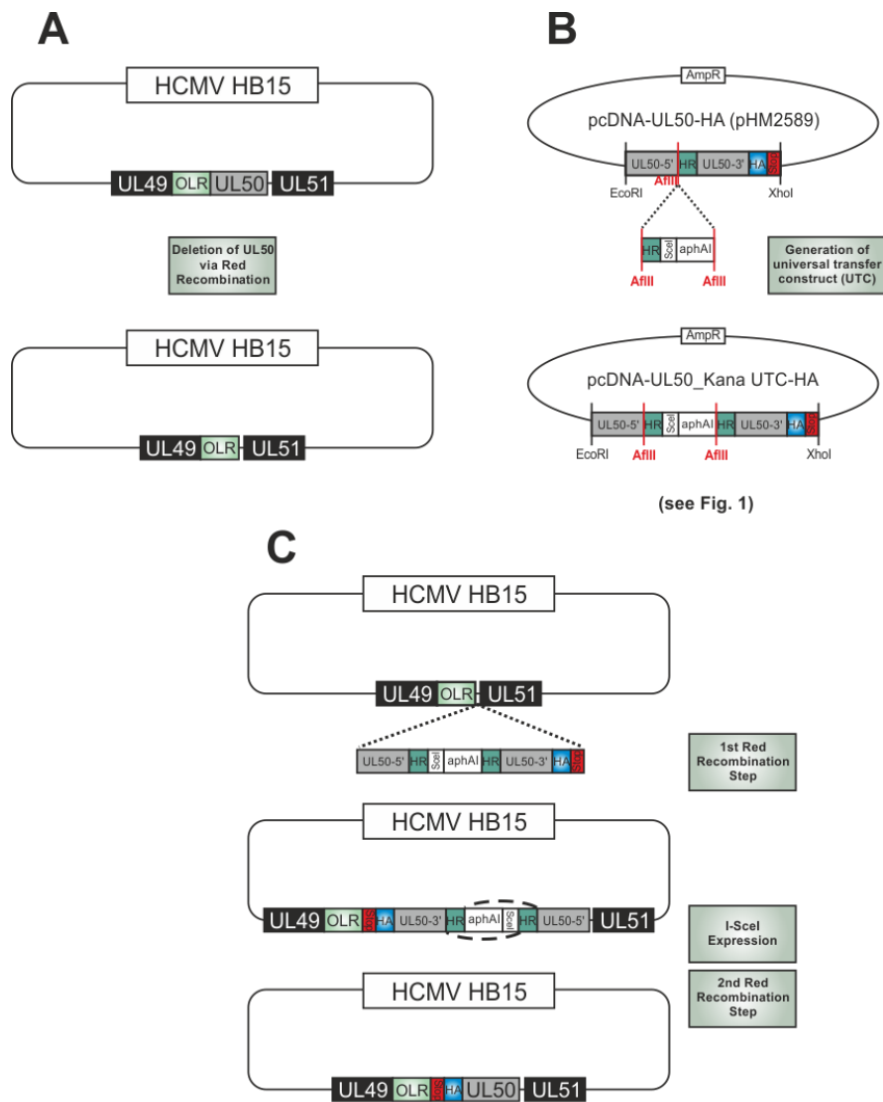

**Figure S1.** Schematic representation of the generation of recombinant HCMVs. **(A)** pUL50 was partially deleted from the HB15 BACmid using Red recombination without affecting the pUL49/pUL50 overlapping region (OLR, highlighted in light green). **(B)** Generation of UTCs, here depicted for wild-type pUL50-HA. Constructs containing homologous regions (HR) important for the second step of Red recombination, an I-SceI restriction site and a kanamycin cassette (aphAI) were inserted into pcDNA3.1 plasmids harboring pUL50-HA, pUL50(S216A)-HA, pUL50(Px5)-HA, pUL50(Mx5)-HA, pUL50, pUL50(Px14), pUL50(Mx14) via an AflIII restriction site. The HA-tag is highlighted in blue and the stop codon in red. **(C)** Exemplary insertion of wild-type ORF UL50-HA (Rev1) Kana into UL50-deleted HB15 HB15/AD169 $\Delta$ UL50. Prior to transformation, homologous regions for insertion into the BACmid were amplified in the respective UTCs and subsequently transformed into bacteria containing HB15/AD169 $\Delta$ UL50 [19]. After I-SceI induction, the second step of Red recombination occurred at homologous regions (HRs, dashed lines) and the kanamycin cassette was deleted from the backbone resulting in the WT pUL50-HA (Rev1) construct.

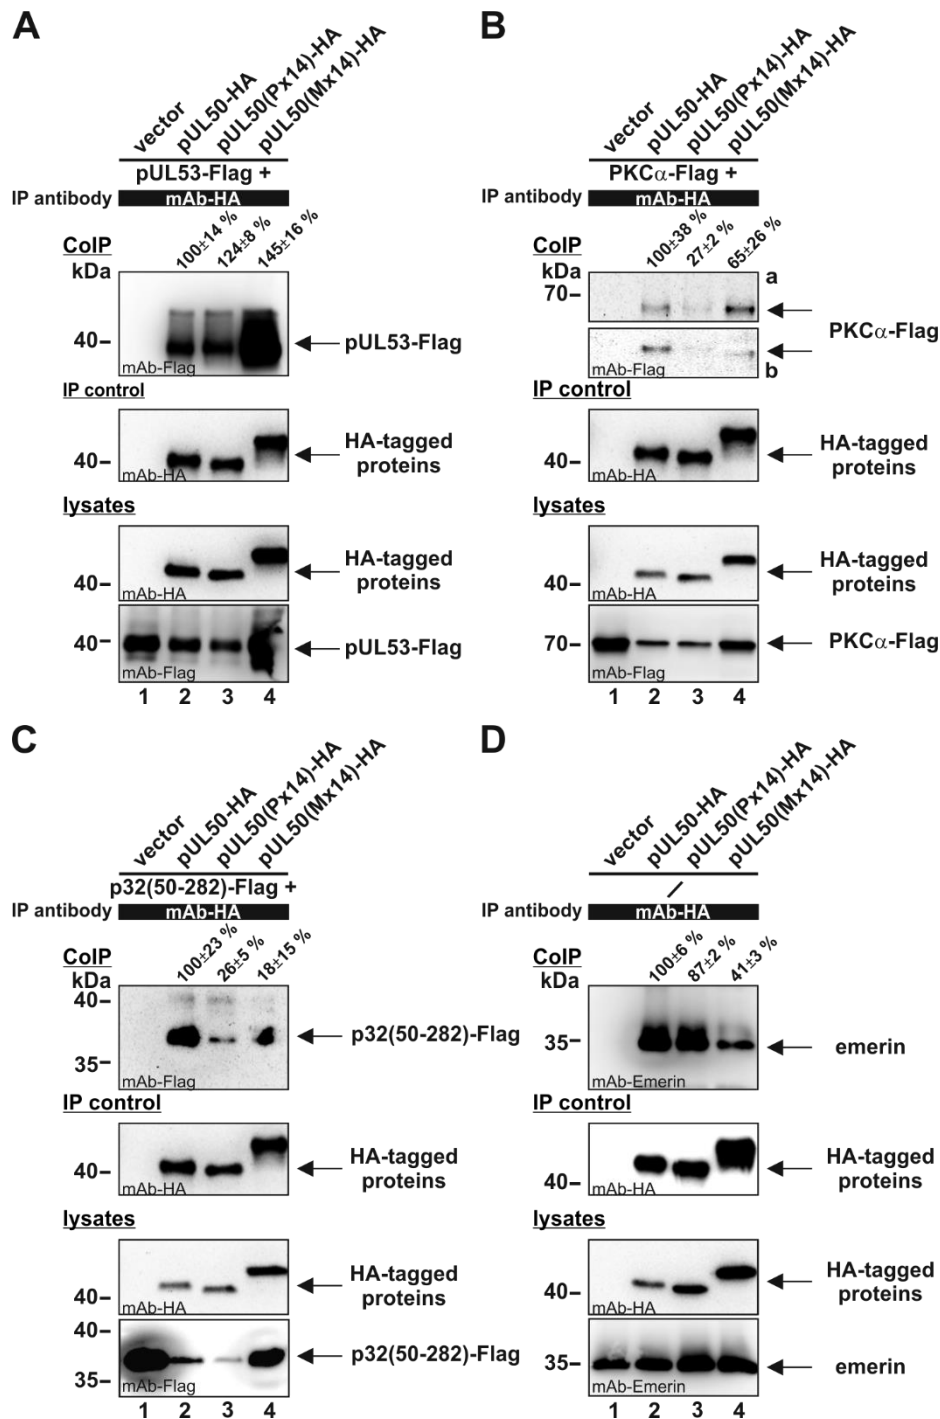

**Figure S2.** CoIP-based interaction analysis of pUL50 phosphosite mutants. 293T cells were transiently transfected with expression plasmids coding for HA-tagged pUL50, pUL50(Px14) or pUL50(Mx14) and Flag-tagged pUL53, PKC $\alpha$  or p32(50-282). At three d p.t., cells were lysed and HA-tagged proteins were immunoprecipitated using mAb-HA. Lysate controls taken prior to the IP and CoIP samples were subjected to standard Wb analysis using tag-specific antibodies as indicated. Signal intensities of pUL50 interaction partners pUL53 (A), PKC $\alpha$  (B), p32(50-282) (C) and emerlin (D) were quantified using Aida Image Analyzer v.4.23.

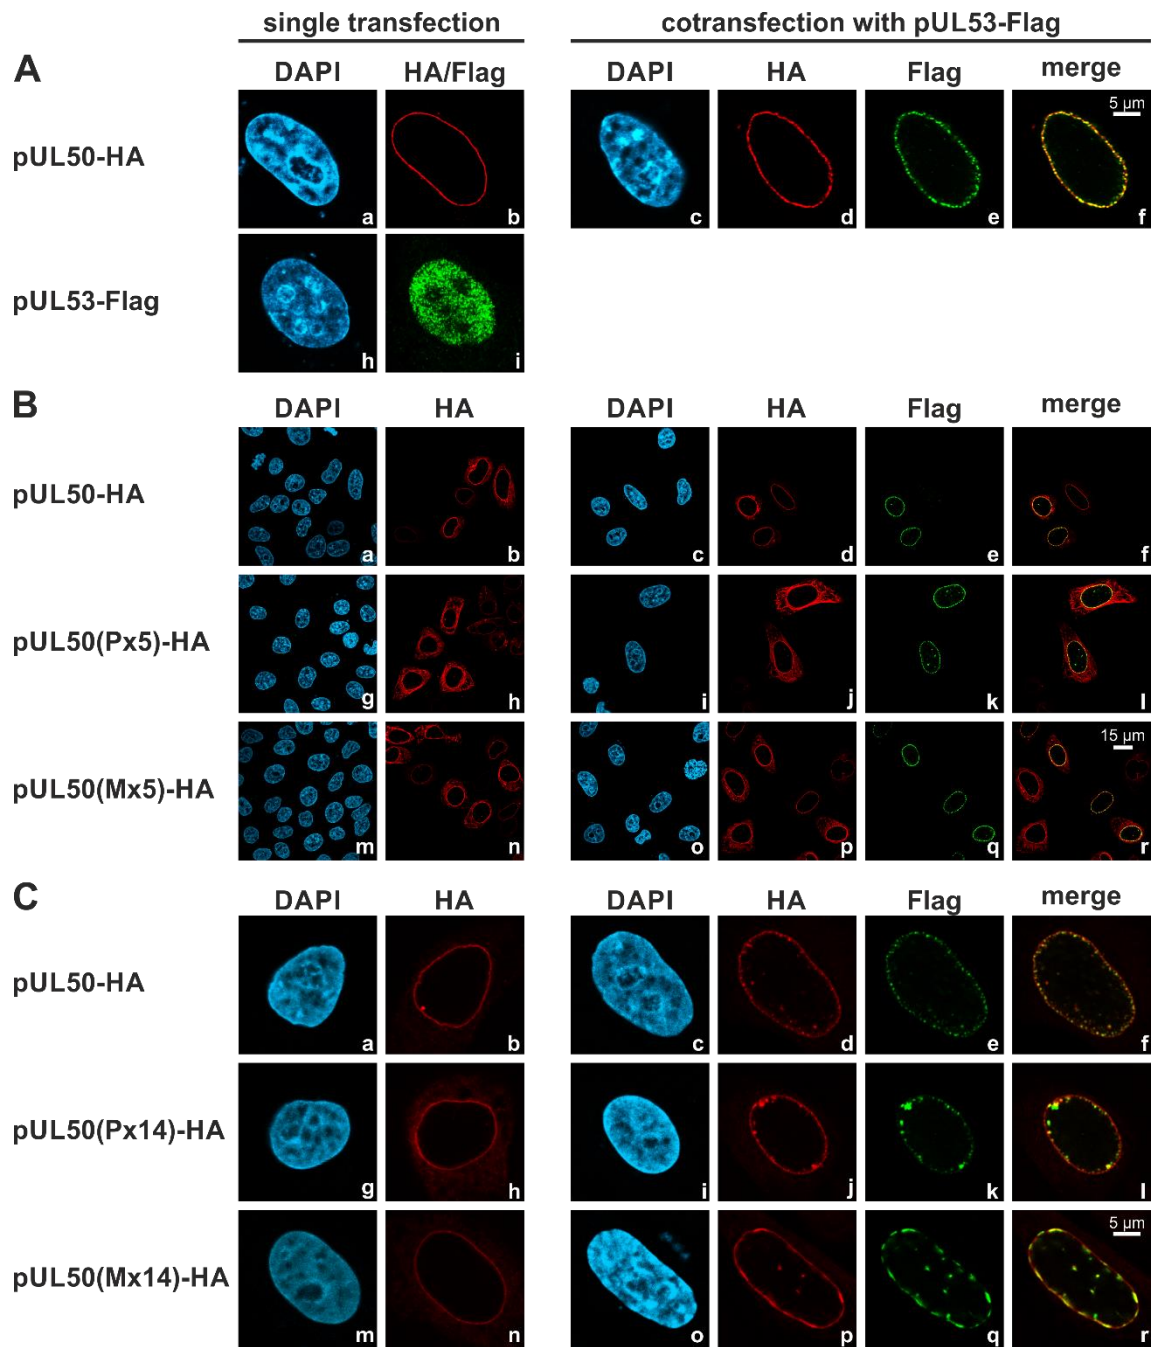

**Figure S3.** Confocal imaging analysis of the localization of pUL50 and pUL53 of transfected phosphosite mutants. HeLa cells were transiently transfected with constructs coding for pUL50-HA, pUL53-Flag, pUL50(Px5)-HA, pUL50(Mx5)-HA, pUL50(Px14)-HA, pUL50(Mx14)-HA (left panel) or cotransfected with pUL53-Flag (right panel). Two d p.t., cells were fixed and used for immunostaining with tag-specific antibodies analyzed by confocal imaging. **(A)** WT constructs for pUL50 and pUL53. **(B)** Phosphosite mutants with five exchanged phosphosites. **(C)** Phosphosite mutants with 14 exchanged phosphosites.

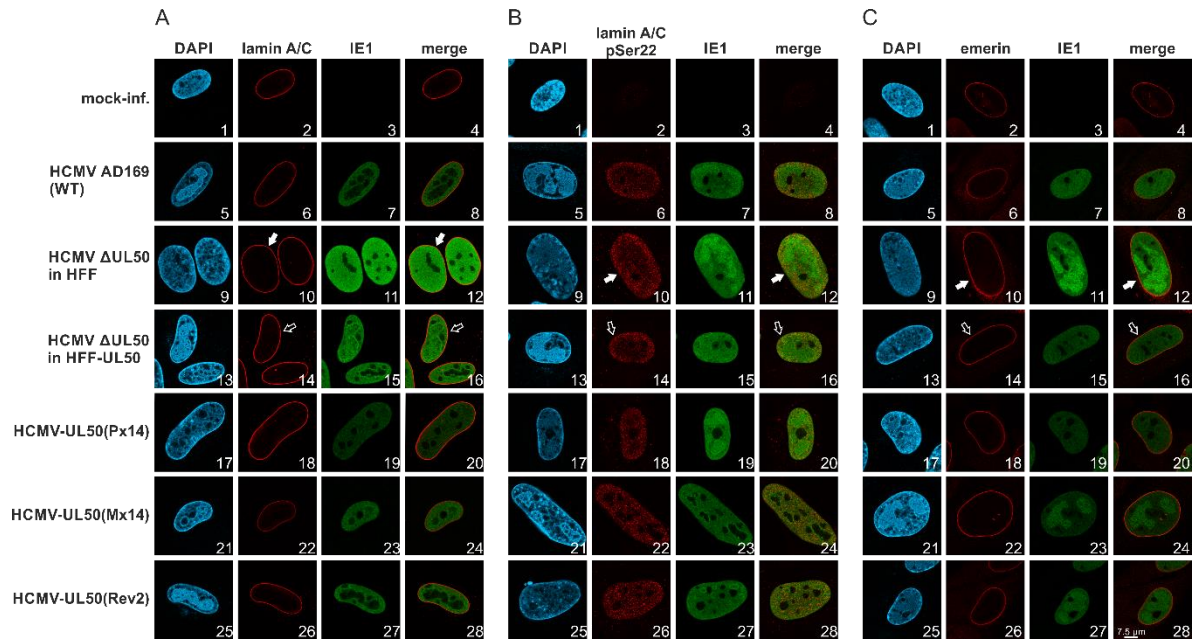

**Figure S4.** Confocal imaging analysis of the localization of cellular proteins produced by HCMV  $\Delta$ UL50 or pUL50 phosphosite mutations. Normal HFFs or pUL50-complementing cells (HFF-UL50 +Dox) were used for infection with the recombinant HCMVs at a MOI of 0.05 and harvested at 7 d p.i.. Immunofluorescence staining was performed with antibodies against the indicated proteins and representative panels of confocal imaging are given (see scale bar in panel C, picture 28). (A-C) Cellular proteins lamin A/C, lamin A/C pSer22 and emerin, showing no alteration in localization patterns.

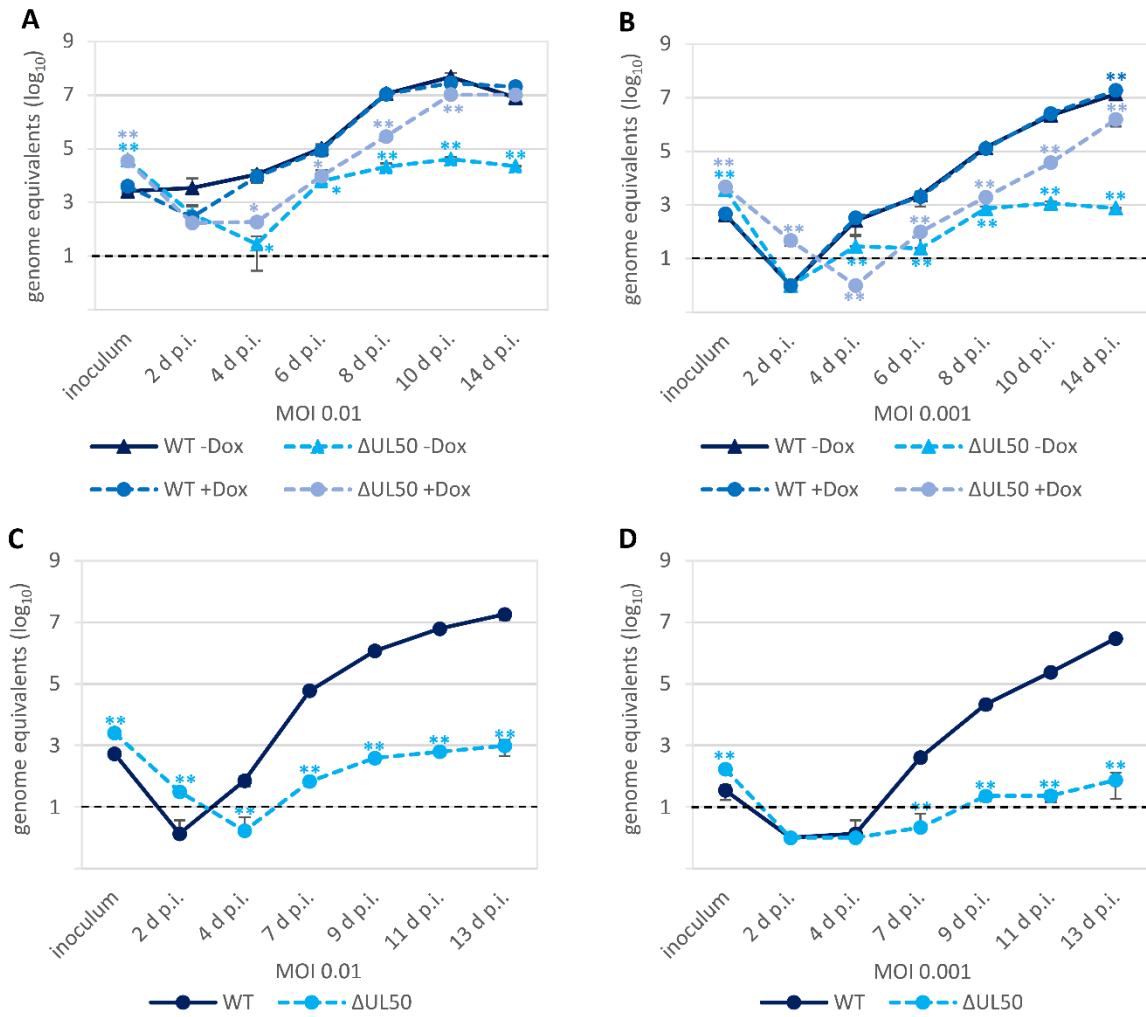

**Figure S5.** HCMV replication kinetics of the ORF-UL50 deletion mutant. HFF-UL50 cells (**A, B**) or HFFs (**C, D**) were infected with parental HCMV AD169 (WT) or recombinant HCMV  $\Delta$ UL50 at a MOI of 0.01 (**A, C**) or 0.001 (**B, D**). Viral supernatants were harvested at the indicated time point and viral genome equivalents released into the supernatant were determined by IE1-specific quantitative real-time PCR. Each infection was performed in triplicate; mean values and standard deviations are shown. The significance is calculated relating to WT (solid lines). The black dashed line shows the limit of detection. \*,  $p \leq 0.05$ ; \*\*,  $p \leq 0.01$ .

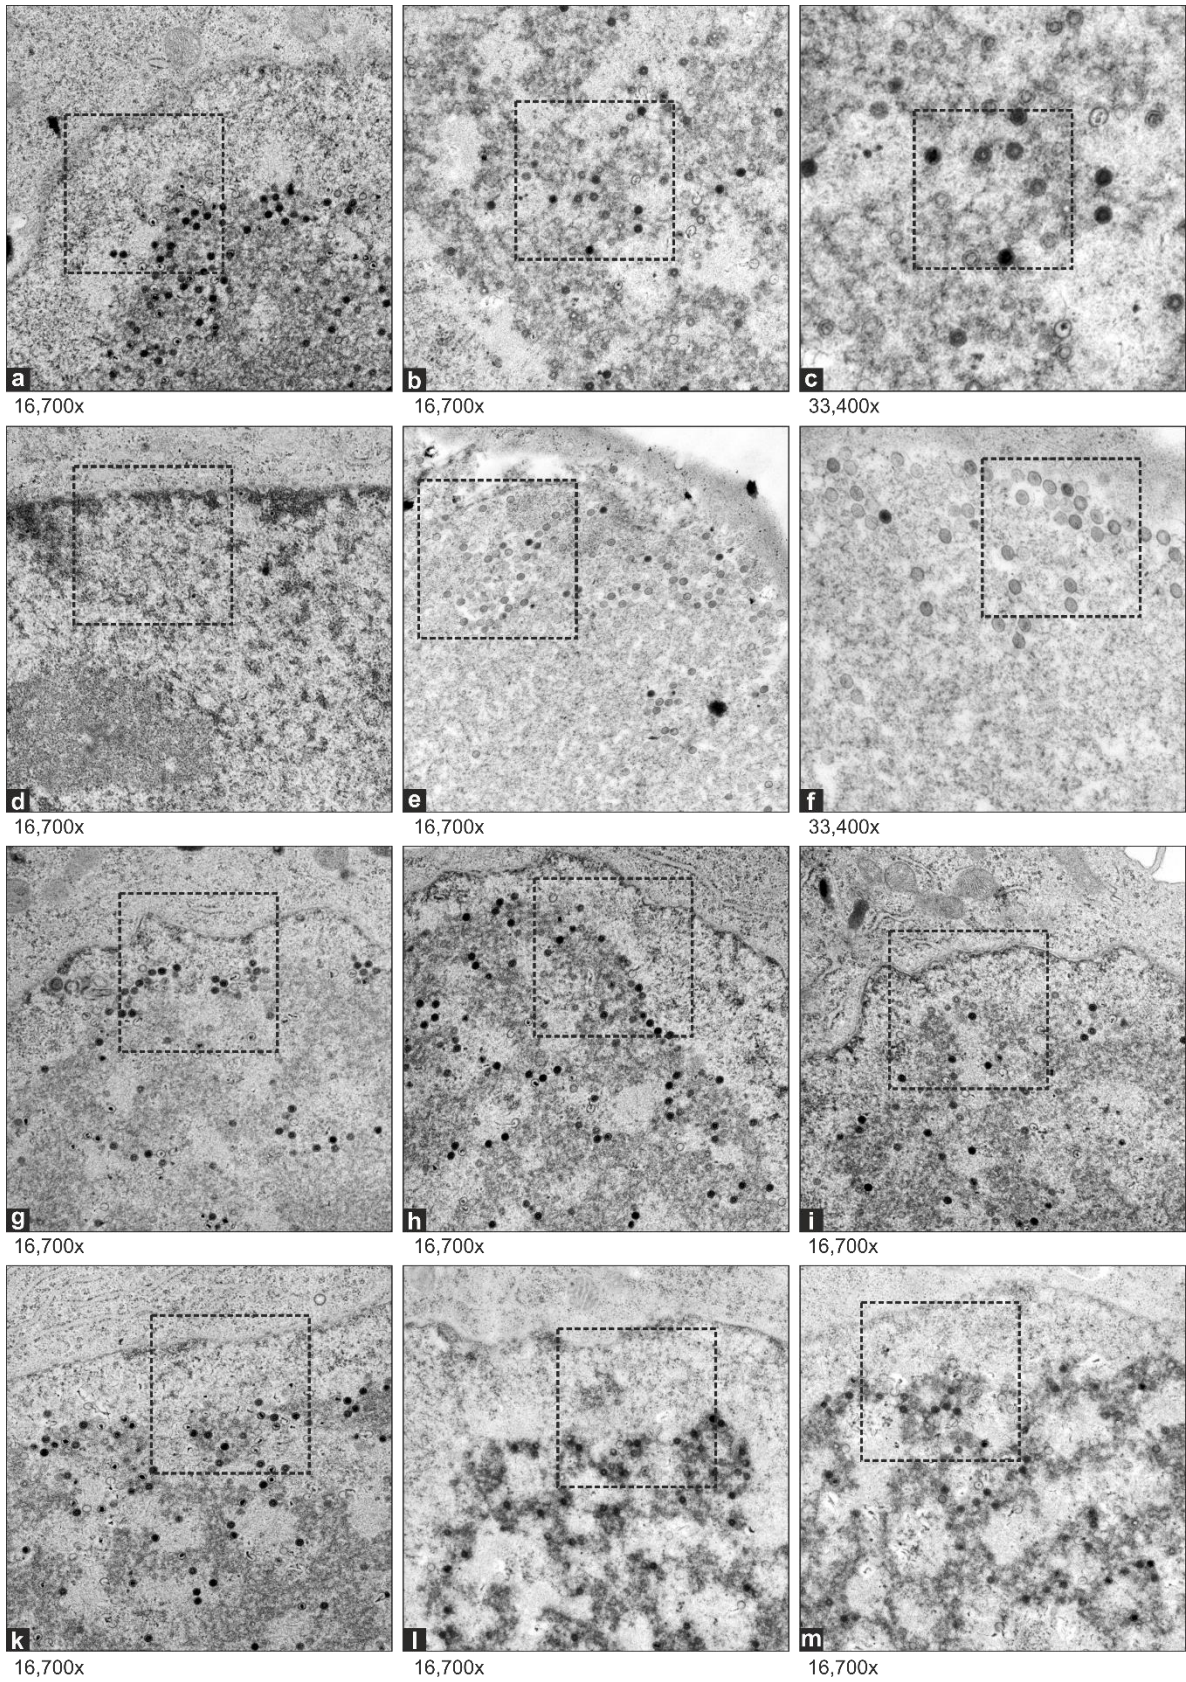

**Figure S6.** Electron microscopic investigation of recombinant viruses. HFFs or HFF-UL50 (b,c) remained mock-infected (d) or were infected with WT (a),  $\Delta$ UL50 +Dox (b,c),  $\Delta$ UL50 -Dox (e,f), Rev1 (g), Px5 (h), Mx5 (i), S216A (k), Px14 (l) or Mx14 (m) and were fixed at 4-7 d p.i. Samples were analyzed by TEM; magnification as indicated. Dashed boxes indicate enlarged pictures shown in Figure 7.

# A

## UL50 Sequences

WT MEMNKVLHQDLVQATRRILKLGPEL RVTDAGL ICKNP NYSVCDAMLK TDTVYC VEYLLS 60  
ΔUL50 -----  
Px5 MEMNKVLHQDLVQATRRILKLGPEL RVTDAGL ICKNP NYSVCDAMLK TDTVYC VEYLLS  
Mx5 MEMNKVLHQDLVQATRRILKLGPEL RVTDAGL ICKNP NYSVCDAMLK TDTVYC VEYLLS  
Rev1 MEMNKVLHQDLVQATRRILKLGPEL RVTDAGL ICKNP NYSVCDAMLK TDTVYC VEYLLS  
Px14 MEMNKVLHQDLVQATRRILKLGPEL RVTDAGL ICKNP NYSVCDAMLK TDTVYC VEYLLS  
Mx14 MEMNKVLHQDLVQATRRILKLGPEL RVTDAGL ICKNP NYSVCDAMLK TDTVYC VEYLLS  
Rev2 MEMNKVLHQDLVQATRRILKLGPEL RVTDAGL ICKNP NYSVCDAMLK TDTVYC VEYLLS

WT YWESR TDHVPCF IFKNTGCAVSLCCFVRAPVKLVSPARHVGEFNV LKVNESLIVTLKDIE 120  
ΔUL50 -----  
Px5 YWESR TDHVPCF IFKNTGCAVSLCCFVRAPVKLVSPARHVGEFNV LKVNESLIVTLKDIE  
Mx5 YWESR TDHVPCF IFKNTGCAVSLCCFVRAPVKLVSPARHVGEFNV LKVNESLIVTLKDIE  
Rev1 YWESR TDHVPCF IFKNTGCAVSLCCFVRAPVKLVSPARHVGEFNV LKVNESLIVTLKDIE  
Px14 YWESR TDHVPCF IFKNTGCAVSLCCFVRAPVKLVSPARHVGEFNV LKVNESLIVTLKDIE  
Mx14 YWESR TDHVPCF IFKNTGCAVSLCCFVRAPVKLVSPARHVGEFNV LKVNESLIVTLKDIE  
Rev2 YWESR TDHVPCF IFKNTGCAVSLCCFVRAPVKLVSPARHVGEFNV LKVNESLIVTLKDIE

WT EIKPSAYGVLTKCVVRKSN SASVFNIELIAFGPENEGEYENLLRELYAKKAAS TSLAVRN 180  
ΔUL50 -----  
Px5 EIKPSAYGVLTKCVVRKSN SASVFNIELIAFGPENEGEYENLLRELYAKKAAS TSLAVRN  
Mx5 EIKPSAYGVLTKCVVRKSN SASVFNIELIAFGPENEGEYENLLRELYAKKAAS TSLAVRN  
Rev1 EIKPSAYGVLTKCVVRKSN SASVFNIELIAFGPENEGEYENLLRELYAKKAAS TSLAVRN  
Px14 EIKPSAYGVLTKCVVRKSN SASVFNIELIAFGPENEGEYENLLRELYAKKAAS TSLAVRN  
Mx14 EIKPSAYGVLTKCVVRKSN SASVFNIELIAFGPENEGEYENLLRELYAKKAAS TSLAVRN  
Rev2 EIKPSAYGVLTKCVVRKSN SASVFNIELIAFGPENEGEYENLLRELYAKKAAS TSLAVRN

WT HVTVSSHSGSGPSLWRARMSAAL TRTAGKRSSRTASPPPPRHPSCSPTMVAAGGAAAGP 239  
ΔUL50 -----  
Px5 HVTVSSHSGSGPSLWRARMSAAL TRTAGKRSSRTASPPPPRHPSCSPTMVAAGGAAAGP  
Mx5 HVTVSSHSGSGPSLWRARMSAAL TRTAGKRSSRTASPPPPRHPSCSPTMVAAGGAAAGP  
Rev1 HVTVSSHSGSGPSLWRARMSAAL TRTAGKRSSRTASPPPPRHPSCSPTMVAAGGAAAGP  
Px14 HVTVSSHSGSGPSLWRARMSAAL TRTAGKRSSRTASPPPPRHPSCSPTMVAAGGAAAGP  
Mx14 HVTVSSHSGSGPSLWRARMSAAL TRTAGKRSSRTASPPPPRHPSCSPTMVAAGGAAAGP  
Rev2 HVTVSSHSGSGPSLWRARMSAAL TRTAGKRSSRTASPPPPRHPSCSPTMVAAGGAAAGP

WT RPPPPPMAAGSWRLCRCEACMGRGCGASEGDADEEEEEELLALAGEGKAAAAAAGQDVGGG 299  
 ΔUL50 -----  
 Px5 RPPPPPMAAGSWRLCRCEACMGRGCGASEGDADEEEEEELLALAGEGKAAAAAAGQDVGGGA  
 Mx5 RPPPPPMAAGSWRLCRCEACMGRGCGASEGDADEEEEEELLALAGEGKAAAAAAGQDVGGGE  
 Rev1 RPPPPPMAAGSWRLCRCEACMGRGCGASEGDADEEEEEELLALAGEGKAAAAAAGQDVGGG  
 Px14 RPPPPPMAAGAWRLCRCEACMGRGCGAAEGDADEEEEEELLALAGEGKAAAAAAGQDVGGGA  
 Mx14 RPPPPPMAAGEWRLCRCEACMGRGCGAEEGDADEEEEEELLALAGEGKAAAAAAGQDVGGGE  
 Rev2 RPPPPPMAAGSWRLCRCEACMGRGCGASEGDADEEEEEELLALAGEGKAAAAAAGQDVGGG

WT ARRPLEEHVSRRRGVSTHHRHPPSPPCAPSLERTGYRWAPSSWWRARSGPSRPQSGPWLP 359  
 ΔUL50 -----  
 Px5 ARRPLEEHVSRRRGVSTHHRHPPAPPCAPSLERTGYRWAPSSWWRARSGPSRPQSGPWLP  
 Mx5 ARRPLEEHVSRRRGVSTHHRHPPAPPCAPSLERTGYRWAPSSWWRARSGPSRPQSGPWLP  
 Rev1 ARRPLEEHVSRRRGVSTHHRHPPSPPCAPSLERTGYRWAPSSWWRARSGPSRPQSGPWLP  
 Px14 ARRPLEEHVSRRRGVSTHHRHPPAPPCAPALERTGYRWAPSSWWRARSGPSRPQSGPWLP  
 Mx14 ARRPLEEHVSRRRGVSTHHRHPPAPPCAPELERTGYRWAPSSWWRARSGPSRPQSGPWLP  
 Rev2 ARRPLEEHVSRRRGVSTHHRHPPSPPCAPSLERTGYRWAPSSWWRARSGPSRPQSGPWLP

WT ARFATLGPLVLALLLVLALLWRGHGQSSSPTRSAHRD----- 396  
 ΔUL50 -----GQSSSPTRSAHRD-----  
 Px5 ARFATLGPLVLALLLVLALLWRGHGQSSSPTRSAHRDYPYDVPDYA  
 Mx5 ARFATLGPLVLALLLVLALLWRGHGQSSSPTRSAHRDYPYDVPDYA  
 Rev1 ARFATLGPLVLALLLVLALLWRGHGQSSSPTRSAHRDYPYDVPDYA  
 Px14 ARFATLGPLVLALLLVLALLWRGHGQSSSPTRSAHRD-----  
 Mx14 ARFATLGPLVLALLLVLALLWRGHGQSSSPTRSAHRD-----  
 Rev2 ARFATLGPLVLALLLVLALLWRGHGQSSSPTRSAHRD-----

\*\*\*\*\*

**B**  
 UL53 Sequences

WT MSSVSGVRTPRRRSALRSLLRKRRQRELASKVASTVNGATSANNHGEPSPADARPRLT 60  
 ΔUL50 MSSVSGVRTPRRRSALRSLLRKRRQRELASKVASTVNGATSANNHGEPSPADARPRLT  
 Px5 MSSVSGVRTPRRRSALRSLLRKRRQRELASKVASTVNGATSANNHGEPSPADARPRLT  
 Mx5 MSSVSGVRTPRRRSALRSLLRKRRQRELASKVASTVNGATSANNHGEPSPADARPRLT  
 Rev1 MSSVSGVRTPRRRSALRSLLRKRRQRELASKVASTVNGATSANNHGEPSPADARPRLT  
 Px14 MSSVSGVRTPRRRSALRSLLRKRRQRELASKVASTVNGATSANNHGEPSPADARPRLT  
 Mx14 MSSVSGVRTPRRRSALRSLLRKRRQRELASKVASTVNGATSANNHGEPSPADARPRLT  
 Rev2 MSSVSGVRTPRRRSALRSLLRKRRQRELASKVASTVNGATSANNHGEPSPADARPRLT  
 \*\*\*\*\*

WT LHDLDIFREHPELELKYLNMKMAITGKESICLPNFHSHRQHTCLDISPYGNEQVSRI 120  
 ΔUL50 LHDLDIFREHPELELKYLNMKMAITGKESICLPNFHSHRQHTCLDISPYGNEQVSRI  
 Px5 LHDLDIFREHPELELKYLNMKMAITGKESICLPNFHSHRQHTCLDISPYGNEQVSRI



Mx5 LHDLHDIFREHPELELKYLNMKMAITGKESICLPFNHSHRQHTCLDISPYGNEQVSRI  
Rev1 LHDLHDIFREHPELELKYLNMKMAITGKESICLPFNHSHRQHTCLDISPYGNEQVSRI  
Px14 LHDLHDIFREHPELELKYLNMKMAITGKESICLPFNHSHRQHTCLDISPYGNEQVSRI  
Mx14 LHDLHDIFREHPELELKYLNMKMAITGKESICLPFNHSHRQHTCLDISPYGNEQVSRI  
Rev2 LHDLHDIFREHPELELKYLNMKMAITGKESICLPFNHSHRQHTCLDISPYGNEQVSRI  
\*\*\*\*\*

WT ACTSCEDNRILPTASDAMVAFINQTSNIMKNRNFYYGFCKSSELLKLNSTNQPPIFQIYYL 180  
ΔUL50 ACTSCEDNRILPTASDAMVAFINQTSNIMKNRNFYYGFCKSSELLKLNSTNQPPIFQIYYL  
Px5 ACTSCEDNRILPTASDAMVAFINQTSNIMKNRNFYYGFCKSSELLKLNSTNQPPIFQIYYL  
Mx5 ACTSCEDNRILPTASDAMVAFINQTSNIMKNRNFYYGFCKSSELLKLNSTNQPPIFQIYYL  
Rev1 ACTSCEDNRILPTASDAMVAFINQTSNIMKNRNFYYGFCKSSELLKLNSTNQPPIFQIYYL  
Px14 ACTSCEDNRILPTASDAMVAFINQTSNIMKNRNFYYGFCKSSELLKLNSTNQPPIFQIYYL  
Mx14 ACTSCEDNRILPTASDAMVAFINQTSNIMKNRNFYYGFCKSSELLKLNSTNQPPIFQIYYL  
Rev2 ACTSCEDNRILPTASDAMVAFINQTSNIMKNRNFYYGFCKSSELLKLNSTNQPPIFQIYYL  
\*\*\*\*\*

WT LHAANHDI VPFMHAEDGRLHMHVIFENPDVHIPCDCITQMLTAAREDYSVTLNIVRDHV 240  
ΔUL50 LHAANHDI VPFMHAEDGRLHMHVIFENPDVHIPCDCITQMLTAAREDYSVTLNIVRDHV  
Px5 LHAANHDI VPFMHAEDGRLHMHVIFENPDVHIPCDCITQMLTAAREDYSVTLNIVRDHV  
Mx5 LHAANHDI VPFMHAEDGRLHMHVIFENPDVHIPCDCITQMLTAAREDYSVTLNIVRDHV  
Rev1 LHAANHDI VPFMHAEDGRLHMHVIFENPDVHIPCDCITQMLTAAREDYSVTLNIVRDHV  
Px14 LHAANHDI VPFMHAEDGRLHMHVIFENPDVHIPCDCITQMLTAAREDYSVTLNIVRDHV  
Mx14 LHAANHDI VPFMHAEDGRLHMHVIFENPDVHIPCDCITQMLTAAREDYSVTLNIVRDHV  
Rev2 LHAANHDI VPFMHAEDGRLHMHVIFENPDVHIPCDCITQMLTAAREDYSVTLNIVRDHV  
\*\*\*\*\*

WT ISVLCHAVSASSVKIDVTILQRKIDEMDIPNDVSESFERYKELIQELCQSSGNNLYEEAT 300  
ΔUL50 ISVLCHAVSASSVKIDVTILQRKIDEMDIPNDVSESFERYKELIQELCQSSGNNLYEEAT  
Px5 ISVLCHAVSASSVKIDVTILQRKIDEMDIPNDVSESFERYKELIQELCQSSGNNLYEEAT  
Mx5 ISVLCHAVSASSVKIDVTILQRKIDEMDIPNDVSESFERYKELIQELCQSSGNNLYEEAT  
Rev1 ISVLCHAVSASSVKIDVTILQRKIDEMDIPNDVSESFERYKELIQELCQSSGNNLYEEAT  
Px14 ISVLCHAVSASSVKIDVTILQRKIDEMDIPNDVSESFERYKELIQELCQSSGNNLYEEAT  
Mx14 ISVLCHAVSASSVKIDVTILQRKIDEMDIPNDVSESFERYKELIQELCQSSGNNLYEEAT  
Rev2 ISVLCHAVSASSVKIDVTILQRKIDEMDIPNDVSESFERYKELIQELCQSSGNNLYEEAT  
\*\*\*\*\*

WT SSYAIRSPLTASPLHVVSTNGCGPSSSSQSTPPHLHPPSQATQPHHYSHHQSQSQQHHR 360  
 ΔUL50 SSYAIRSPLTASPLHVVSTNGCGPSSSSQSTPPHLHPPSQATQPHHYSHHQSQSQQHHR  
 Px5 SSYAIRSPLTASPLHVVSTNGCGPSSSSQSTPPHLHPPSQATQPHHYSHHQSQSQQHHR  
 Mx5 SSYAIRSPLTASPLHVVSTNGCGPSSSSQSTPPHLHPPSQATQPHHYSHHQSQSQQHHR  
 Rev1 SSYAIRSPLTASPLHVVSTNGCGPSSSSQSTPPHLHPPSQATQPHHYSHHQSQSQQHHR  
 Px14 SSYAIRSPLTASPLHVVSTNGCGPSSSSQSTPPHLHPPSQATQPHHYSHHQSQSQQHHR  
 Mx14 SSYAIRSPLTASPLHVVSTNGCGPSSSSQSTPPHLHPPSQATQPHHYSHHQSQSQQHHR  
 Rev2 SSYAIRSPLTASPLHVVSTNGCGPSSSSQSTPPHLHPPSQATQPHHYSHHQSQSQQHHR  
 \*\*\*\*\*

WT PQSPPPPLFLNSIRAP 375  
 ΔUL50 PQSPPPPLFLNSIRAP  
 Px5 PQSPPPPLFLNSIRAP  
 Mx5 PQSPPPPLFLNSIRAP  
 Rev1 PQSPPPPLFLNSIRAP  
 Px14 PQSPPPPLFLNSIRAP  
 Mx14 PQSPPPPLFLNSIRAP  
 Rev2 PQSPPPPLFLNSIRAP  
 \*\*\*\*\*

## C UL97 Sequences

WT MSSALRSRARSASLGTTTQGWDPPLRRPSRARRRQWMREAAQAAAQAAVQAAQAAAQV 60  
 ΔUL50 MSSALRSRARSASLGTTTQGWDPPLRRPSRARRRQWMREAAQAAAQAAVQAAQAAAQV  
 Px5 MSSALRSRARSASLGTTTQGWDPPLRRPSRARRRQWMREAAQAAAQAAVQAAQAAAQV  
 Mx5 MSSALRSRARSASLGTTTQGWDPPLRRPSRARRRQWMREAAQAAAQAAVQAAQAAAQV  
 Rev1 MSSALRSRARSASLGTTTQGWDPPLRRPSRARRRQWMREAAQAAAQAAVQAAQAAAQV  
 Px14 MSSALRSRARSASLGTTTQGWDPPLRRPSRARRRQWMREAAQAAAQAAVQAAQAAAQV  
 Mx14 MSSALRSRARSASLGTTTQGWDPPLRRPSRARRRQWMREAAQAAAQAAVQAAQAAAQV  
 Rev2 MSSALRSRARSASLGTTTQGWDPPLRRPSRARRRQWMREAAQAAAQAAVQAAQAAAQV  
 \*\*\*\*\*

WT AQAHVDENEVVDLMADEAGGGVTTLTTLSSVSTTTVLGHATFSACVRSVMDRGEKEDAA 120  
 ΔUL50 AQAHVDENEVVDLMADEAGGGVTTLTTLSSVSTTTVLGHATFSACVRSVMDRGEKEDAA  
 Px5 AQAHVDENEVVDLMADEAGGGVTTLTTLSSVSTTTVLGHATFSACVRSVMDRGEKEDAA  
 Mx5 AQAHVDENEVVDLMADEAGGGVTTLTTLSSVSTTTVLGHATFSACVRSVMDRGEKEDAA  
 Rev1 AQAHVDENEVVDLMADEAGGGVTTLTTLSSVSTTTVLGHATFSACVRSVMDRGEKEDAA  
 Px14 AQAHVDENEVVDLMADEAGGGVTTLTTLSSVSTTTVLGHATFSACVRSVMDRGEKEDAA  
 Mx14 AQAHVDENEVVDLMADEAGGGVTTLTTLSSVSTTTVLGHATFSACVRSVMDRGEKEDAA  
 Rev2 AQAHVDENEVVDLMADEAGGGVTTLTTLSSVSTTTVLGHATFSACVRSVMDRGEKEDAA  
 \*\*\*\*\*

WT SDKENLRPVPVSTSSRGSAAAGGDGYHGLRCRETSAMWSFEYDRDGDVTSVRRALFTGGS 180  
ΔUL50 SDKENLRPVPVSTSSRGSAAAGGDGYHGLRCRETSAMWSFEYDRDGDVTSVRRALFTGGS  
Px5 SDKENLRPVPVSTSSRGSAAAGGDGYHGLRCRETSAMWSFEYDRDGDVTSVRRALFTGGS  
Mx5 SDKENLRPVPVSTSSRGSAAAGGDGYHGLRCRETSAMWSFEYDRDGDVTSVRRALFTGGS  
Rev1 SDKENLRPVPVSTSSRGSAAAGGDGYHGLRCRETSAMWSFEYDRDGDVTSVRRALFTGGS  
Px14 SDKENLRPVPVSTSSRGSAAAGGDGYHGLRCRETSAMWSFEYDRDGDVTSVRRALFTGGS  
Mx14 SDKENLRPVPVSTSSRGSAAAGGDGYHGLRCRETSAMWSFEYDRDGDVTSVRRALFTGGS  
Rev2 SDKENLRPVPVSTSSRGSAAAGGDGYHGLRCRETSAMWSFEYDRDGDVTSVRRALFTGGS  
\*\*\*\*\*

WT DPDSVSGVRGGRKRPLRPPLVSLARTPLCRRRVGGVDAVLEENDVELRAESQDSAVASG 240  
ΔUL50 DPDSVSGVRGGRKRPLRPPLVSLARTPLCRRRVGGVDAVLEENDVELRAESQDSAVASG  
Px5 DPDSVSGVRGGRKRPLRPPLVSLARTPLCRRRVGGVDAVLEENDVELRAESQDSAVASG  
Mx5 DPDSVSGVRGGRKRPLRPPLVSLARTPLCRRRVGGVDAVLEENDVELRAESQDSAVASG  
Rev1 DPDSVSGVRGGRKRPLRPPLVSLARTPLCRRRVGGVDAVLEENDVELRAESQDSAVASG  
Px14 DPDSVSGVRGGRKRPLRPPLVSLARTPLCRRRVGGVDAVLEENDVELRAESQDSAVASG  
Mx14 DPDSVSGVRGGRKRPLRPPLVSLARTPLCRRRVGGVDAVLEENDVELRAESQDSAVASG  
Rev2 DPDSVSGVRGGRKRPLRPPLVSLARTPLCRRRVGGVDAVLEENDVELRAESQDSAVASG  
\*\*\*\*\*

WT PGRIPQPLSGSSGEESATAVEADSTSHDDVHCTCSNDQIITTSIRGLTCDPRMFLRLTHP 300  
ΔUL50 PGRIPQPLSGSSGEESATAVEADSTSHDDVHCTCSNDQIITTSIRGLTCDPRMFLRLTHP  
Px5 PGRIPQPLSGSSGEESATAVEADSTSHDDVHCTCSNDQIITTSIRGLTCDPRMFLRLTHP  
Mx5 PGRIPQPLSGSSGEESATAVEADSTSHDDVHCTCSNDQIITTSIRGLTCDPRMFLRLTHP  
Rev1 PGRIPQPLSGSSGEESATAVEADSTSHDDVHCTCSNDQIITTSIRGLTCDPRMFLRLTHP  
Px14 PGRIPQPLSGSSGEESATAVEADSTSHDDVHCTCSNDQIITTSIRGLTCDPRMFLRLTHP  
Mx14 PGRIPQPLSGSSGEESATAVEADSTSHDDVHCTCSNDQIITTSIRGLTCDPRMFLRLTHP  
Rev2 PGRIPQPLSGSSGEESATAVEADSTSHDDVHCTCSNDQIITTSIRGLTCDPRMFLRLTHP  
\*\*\*\*\*

WT ELCELSISYLLVYVPKEDDFCHKICYAVDMSDESYRLGQGSFGEVWPLDRYRVVKVARKH 360  
ΔUL50 ELCELSISYLLVYVPKEDDFCHKICYAVDMSDESYRLGQGSFGEVWPLDRYRVVKVARKH  
Px5 ELCELSISYLLVYVPKEDDFCHKICYAVDMSDESYRLGQGSFGEVWPLDRYRVVKVARKH  
Mx5 ELCELSISYLLVYVPKEDDFCHKICYAVDMSDESYRLGQGSFGEVWPLDRYRVVKVARKH  
Rev1 ELCELSISYLLVYVPKEDDFCHKICYAVDMSDESYRLGQGSFGEVWPLDRYRVVKVARKH  
Px14 ELCELSISYLLVYVPKEDDFCHKICYAVDMSDESYRLGQGSFGEVWPLDRYRVVKVARKH  
Mx14 ELCELSISYLLVYVPKEDDFCHKICYAVDMSDESYRLGQGSFGEVWPLDRYRVVKVARKH  
Rev2 ELCELSISYLLVYVPKEDDFCHKICYAVDMSDESYRLGQGSFGEVWPLDRYRVVKVARKH  
\*\*\*\*\*

WT SETVLTVWMSGLIRTRAAGEQQPPSLVGTGVHRGLLTATGCCLLHNVTVHRRFHTDMFH 420  
ΔUL50 SETVLTVWMSGLIRTRAAGEQQPPSLVGTGVHRGLLTATGCCLLHNVTVHRRFHTDMFH  
Px5 SETVLTVWMSGLIRTRAAGEQQPPSLVGTGVHRGLLTATGCCLLHNVTVHRRFHTDMFH  
Mx5 SETVLTVWMSGLIRTRAAGEQQPPSLVGTGVHRGLLTATGCCLLHNVTVHRRFHTDMFH  
Rev1 SETVLTVWMSGLIRTRAAGEQQPPSLVGTGVHRGLLTATGCCLLHNVTVHRRFHTDMFH  
Px14 SETVLTVWMSGLIRTRAAGEQQPPSLVGTGVHRGLLTATGCCLLHNVTVHRRFHTDMFH  
Mx14 SETVLTVWMSGLIRTRAAGEQQPPSLVGTGVHRGLLTATGCCLLHNVTVHRRFHTDMFH  
Rev2 SETVLTVWMSGLIRTRAAGEQQPPSLVGTGVHRGLLTATGCCLLHNVTVHRRFHTDMFH  
\*\*\*\*\*

WT HDQWKLACIDSYRRRAFCTLADAIKFLNHQCRVCHFDITPMNVLIDVNPHPSEIVRAALC 480  
ΔUL50 HDQWKLACIDSYRRRAFCTLADAIKFLNHQCRVCHFDITPMNVLIDVNPHPSEIVRAALC  
Px5 HDQWKLACIDSYRRRAFCTLADAIKFLNHQCRVCHFDITPMNVLIDVNPHPSEIVRAALC  
Mx5 HDQWKLACIDSYRRRAFCTLADAIKFLNHQCRVCHFDITPMNVLIDVNPHPSEIVRAALC  
Rev1 HDQWKLACIDSYRRRAFCTLADAIKFLNHQCRVCHFDITPMNVLIDVNPHPSEIVRAALC  
Px14 HDQWKLACIDSYRRRAFCTLADAIKFLNHQCRVCHFDITPMNVLIDVNPHPSEIVRAALC  
Mx14 HDQWKLACIDSYRRRAFCTLADAIKFLNHQCRVCHFDITPMNVLIDVNPHPSEIVRAALC  
Rev2 HDQWKLACIDSYRRRAFCTLADAIKFLNHQCRVCHFDITPMNVLIDVNPHPSEIVRAALC  
\*\*\*\*\*

WT DYSLSEPYPDYNERCVAVFQETGTARRIPNCSHRLRECYHPAFRPMPLQKLLICDPHARF 540  
ΔUL50 DYSLSEPYPDYNERCVAVFQETGTARRIPNCSHRLRECYHPAFRPMPLQKLLICDPHARF  
Px5 DYSLSEPYPDYNERCVAVFQETGTARRIPNCSHRLRECYHPAFRPMPLQKLLICDPHARF  
Mx5 DYSLSEPYPDYNERCVAVFQETGTARRIPNCSHRLRECYHPAFRPMPLQKLLICDPHARF  
Rev1 DYSLSEPYPDYNERCVAVFQETGTARRIPNCSHRLRECYHPAFRPMPLQKLLICDPHARF  
Px14 DYSLSEPYPDYNERCVAVFQETGTARRIPNCSHRLRECYHPAFRPMPLQKLLICDPHARF  
Mx14 DYSLSEPYPDYNERCVAVFQETGTARRIPNCSHRLRECYHPAFRPMPLQKLLICDPHARF  
Rev2 DYSLSEPYPDYNERCVAVFQETGTARRIPNCSHRLRECYHPAFRPMPLQKLLICDPHARF  
\*\*\*\*\*

WT PVAGLRRYCMSELSALGNVLGFCLMRLDDRGLDEVVMGTEALLFKHAGAACRALENGKL 600  
ΔUL50 PVAGLRRYCMSELSALGNVLGFCLMRLDDRGLDEVVMGTEALLFKHAGAACRALENGKL  
Px5 PVAGLRRYCMSELSALGNVLGFCLMRLDDRGLDEVVMGTEALLFKHAGAACRALENGKL  
Mx5 PVAGLRRYCMSELSALGNVLGFCLMRLDDRGLDEVVMGTEALLFKHAGAACRALENGKL  
Rev1 PVAGLRRYCMSELSALGNVLGFCLMRLDDRGLDEVVMGTEALLFKHAGAACRALENGKL  
Px14 PVAGLRRYCMSELSALGNVLGFCLMRLDDRGLDEVVMGTEALLFKHAGAACRALENGKL  
Mx14 PVAGLRRYCMSELSALGNVLGFCLMRLDDRGLDEVVMGTEALLFKHAGAACRALENGKL  
Rev2 PVAGLRRYCMSELSALGNVLGFCLMRLDDRGLDEVVMGTEALLFKHAGAACRALENGKL  
\*\*\*\*\*

```

WT          THCSDACLLILAAQMSYGACLLGEHGAALVSHTLRFVEAKMSSCRVRAFRRFYHECSQTM 660
ΔUL50      THCSDACLLILAAQMSYGACLLGEHGAALVSHTLRFVEAKMSSCRVRAFRRFYHECSQTM
Px5        THCSDACLLILAAQMSYGACLLGEHGAALVSHTLRFVEAKMSSCRVRAFRRFYHECSQTM
Mx5        THCSDACLLILAAQMSYGACLLGEHGAALVSHTLRFVEAKMSSCRVRAFRRFYHECSQTM
Rev1       THCSDACLLILAAQMSYGACLLGEHGAALVSHTLRFVEAKMSSCRVRAFRRFYHECSQTM
Px14       THCSDACLLILAAQMSYGACLLGEHGAALVSHTLRFVEAKMSSCRVRAFRRFYHECSQTM
Mx14       THCSDACLLILAAQMSYGACLLGEHGAALVSHTLRFVEAKMSSCRVRAFRRFYHECSQTM
Rev2       THCSDACLLILAAQMSYGACLLGEHGAALVSHTLRFVEAKMSSCRVRAFRRFYHECSQTM
*****

```

```

WT          LHEYVRKNVERLLATSDGLYLYNAFRRTTSIICEEDLDGDCRQLFPE 706
ΔUL50      LHEYVRKNVERLLATSDGLYLYNAFRRTTSIICEEDLDGDCRQLFPE
Px5        LHEYVRKNVERLLATSDGLYLYNAFRRTTSIICEEDLDGDCRQLFPE
Mx5        LHEYVRKNVERLLATSDGLYLYNAFRRTTSIICEEDLDGDCRQLFPE
Rev1       LHEYVRKNVERLLATSDGLYLYNAFRRTTSIICEEDLDGDCRQLFPE
Px14       LHEYVRKNVERLLATSDGLYLYNAFRRTTSIICEEDLDGDCRQLFPE
Mx14       LHEYVRKNVERLLATSDGLYLYNAFRRTTSIICEEDLDGDCRQLFPE
Rev2       LHEYVRKNVERLLATSDGLYLYNAFRRTTSIICEEDLDGDCRQLFPE
*****

```

**Figure S7:** Alignments of pUL50, pUL53 and pUL97 of recombinant viruses. Amino acid sequences of reconstituted viruses for pUL50 (**A**) pUL53 (**B**) and pUL97 (**C**). Phosphosite mutations are highlighted in dark grey, additional mutations in bright grey. \* identical amino acids, - no sequence.
